# Supplementary material for: Colon cancer-specific diagnostic and prognostic biomarkers based on genome-wide abnormal DNA methylation
Source: publisher site journal article supplement (doi:10.18632/aging.103874), 2020-11-17
Supplement: Supplementary file [file aging-v12i22-103874-supplementary-material-SD1.pdf]

## SUPPLEMENTARY FIGURES

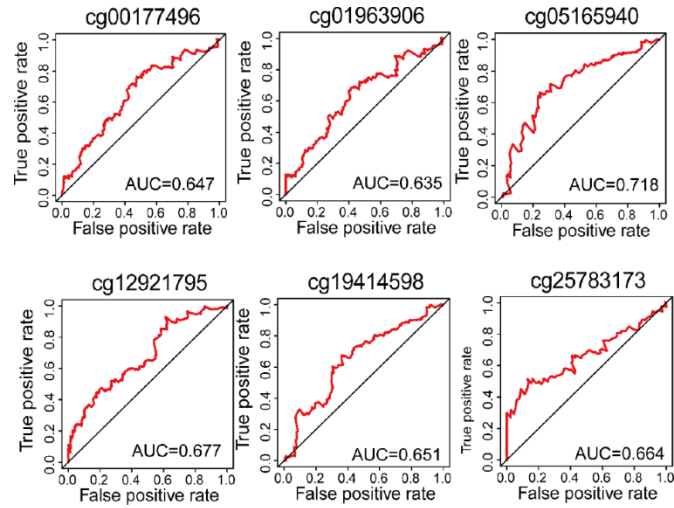

Supplementary Figure 1. The ROC curve analysis of 6 individual CpG site of prognostic biomarkers in the TCGA validation cohort (N=144).

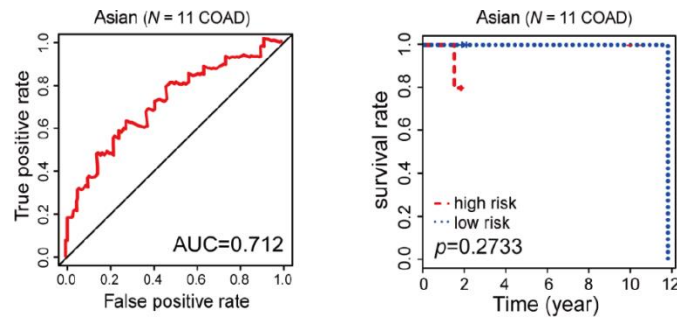

Supplementary Figure 2. Kaplan-Meier and ROC analysis results based on different regrouping methods. Grouping COAD patients according to race: Asian (N=11, 4.09%).

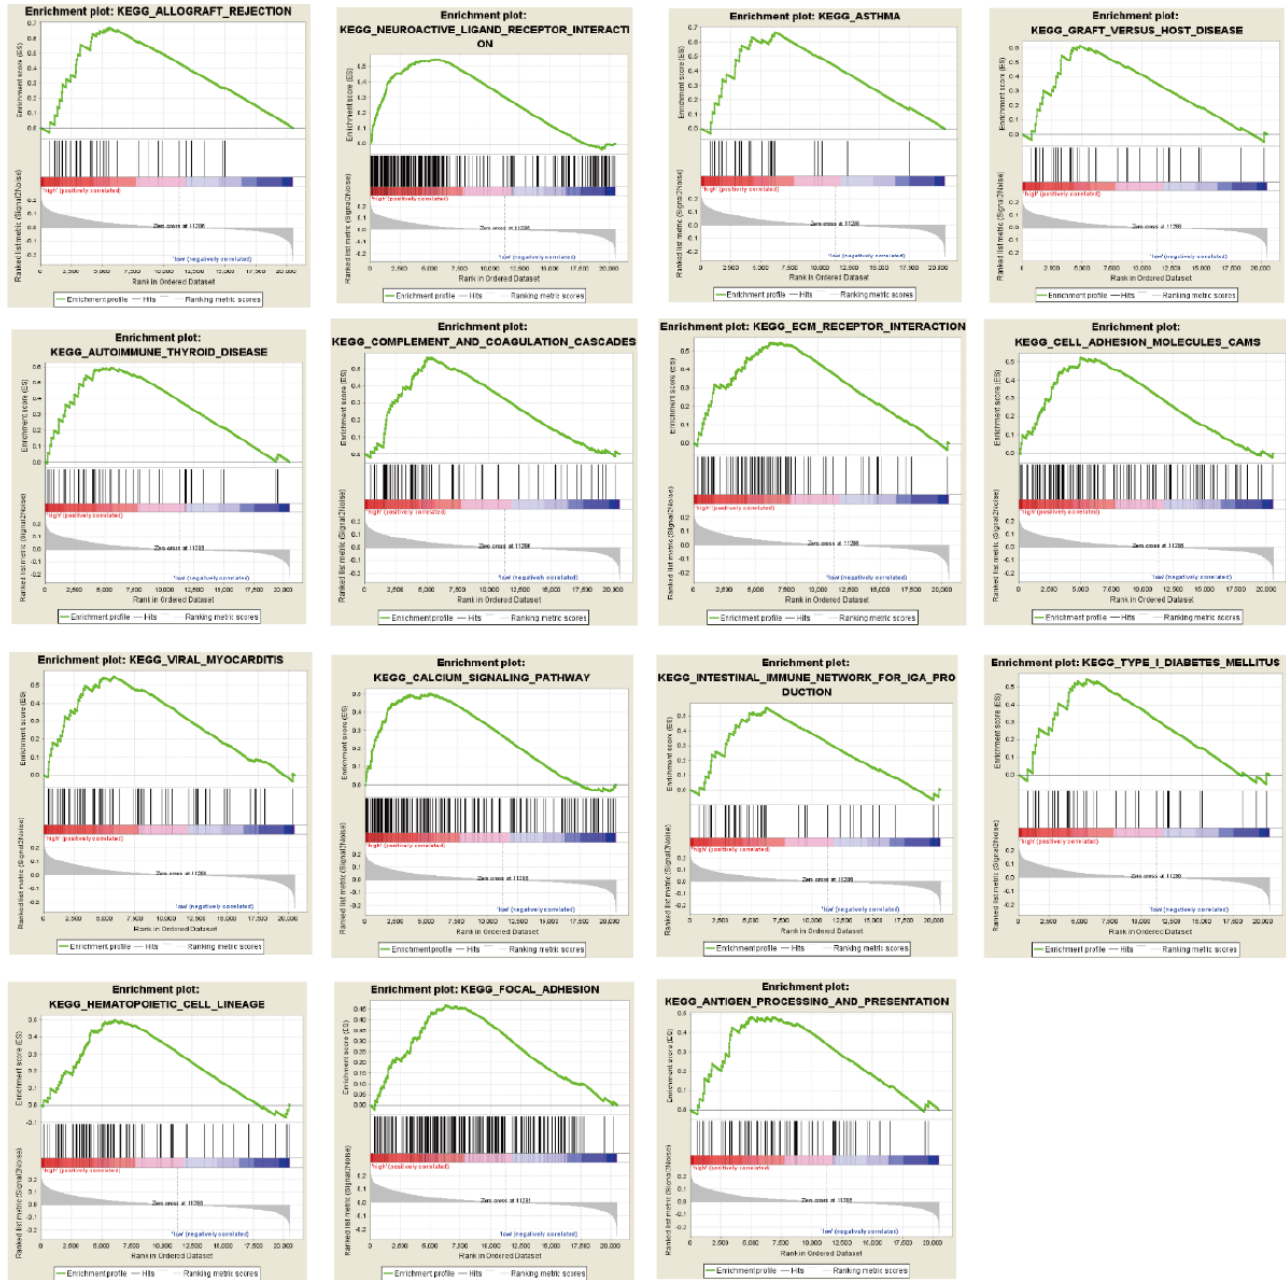

Supplementary Figure 3. The results of GSEA analysis with high-risk and low-risk groups from the TCGA COAD cohort ( $N = 287$ ).

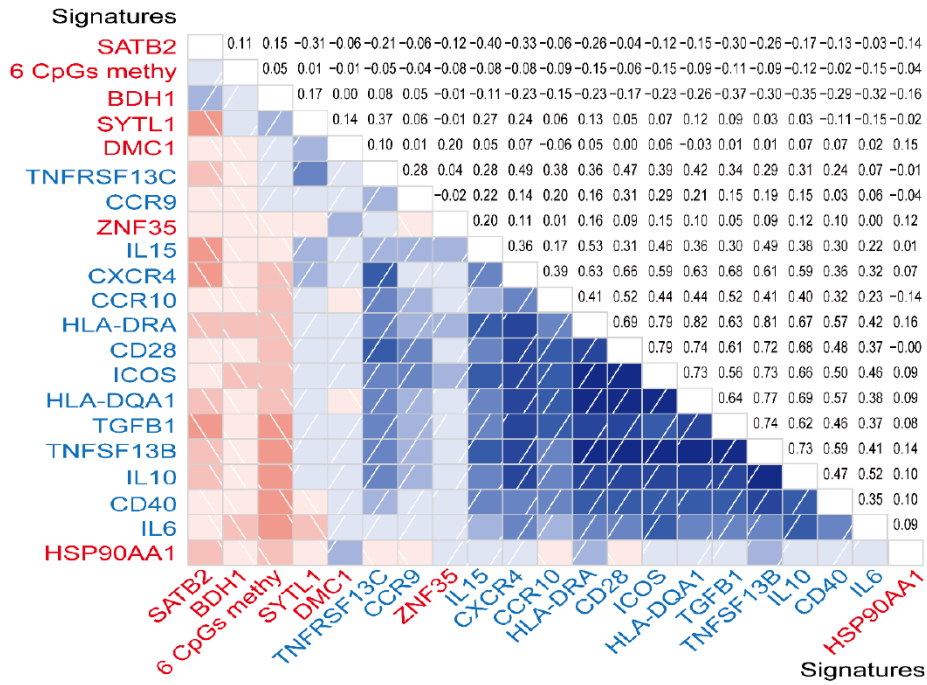

**Supplementary Figure 4. Correlation between the genes corresponding to prognostic methylation biomarkers and the core enrichment genes of the intestinal immune network for the IGA production pathway.** The circled area reflects Pearson's correlation coefficient. The red signature represents the expression value of the corresponding genes of 6 CpG sites and the 6-site combined methylation value; blue signature represents the expression of the core enrichment genes in the intestinal immune network for the IGA production pathway. Lower triangle: grids showing the correlation between two signatures; blue for positive correlation, red for the negative correlation. Upper triangle: numbers represent the one-to-one correlation coefficient, which increases uniformly as the correlation value moves away from 0; blue for positive correlation, red for the negative correlation. It is the digital form of the main diagram.
